# Supplementary material
Source: HighWire-hosted journal article supplement (https://www.cmaj.ca/highwire/filestream/77693/field_highwire_adjunct_files/0/202106-case-1-at.pdf)

## Appendix 1 (as supplied by the authors)

Pre-discharge echocardiogram. A) Parasternal long axis view showing dilated left atrium and left ventricle. Interventricular septum is thin and echo-dense (arrow), left ventricle thrombus not seen; B: right ventricle thrombus not seen; C: Apical 4 chamber view showing dilated left atrium, left ventricle and no left ventricle thrombus, interventricular septum is thin and echo-dense (arrow); D: Apical 2 chamber view showing dilated left ventricle and no thrombus. Note: LA = left atrium, LV = left ventricle, RV = right ventricle.

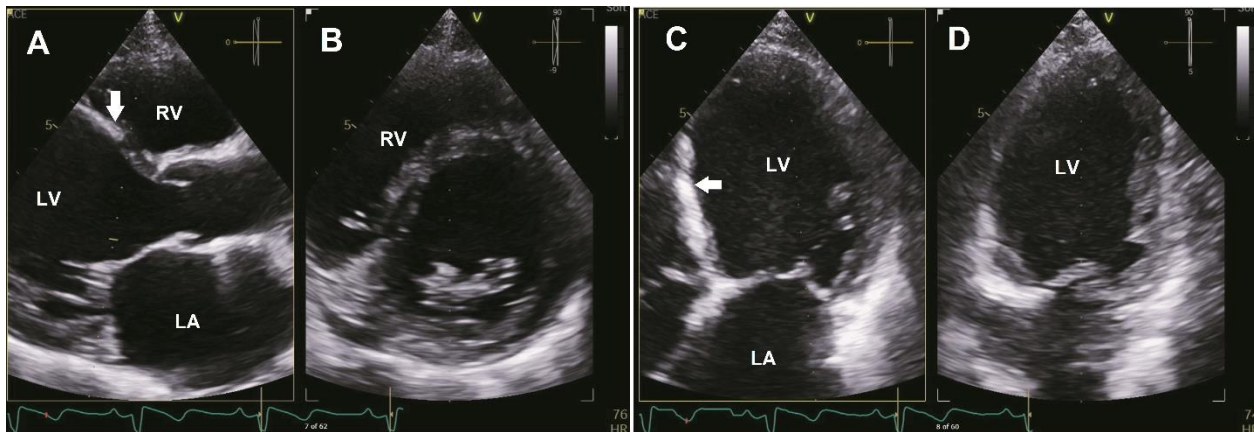

Supplement: 202106-case-1-at.pdf [file 202106-case-1-at.pdf]
